# Supplementary material for: A Microactuator Array Based on Ionic Electroactive Artificial Muscles for Cell Mechanical Stimulation
Source: MDPI journal article supplement (doi:10.3390/biomimetics9050281), 2024-05-08
Supplement: s1 [file s1]

# A Microactuator Array Based on Ionic Electroactive Artificial Muscles for Cell Mechanical Stimulation

Jing Gu <sup>1</sup>, Zixing Zhou <sup>1</sup>, Yang Xie <sup>1</sup>, Xiaobin Zhu <sup>2</sup>, Guoyou Huang <sup>1,\*</sup> and Zuoqi Zhang <sup>1,\*</sup>

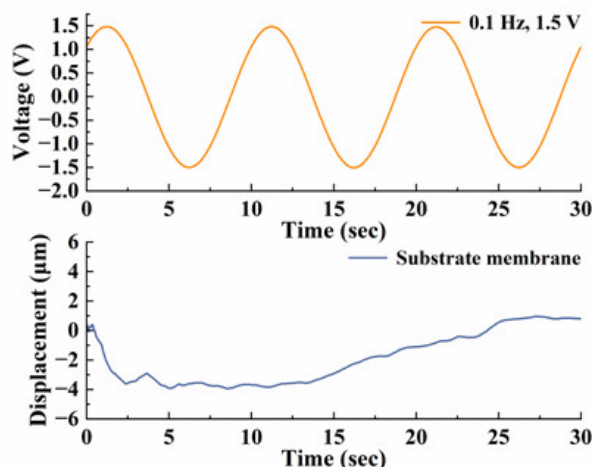

**Figure S1.** Representative curves of the deformation behavior of the substrate membrane region under a sinusoidal voltage of 0.1 Hz 1.5 V.

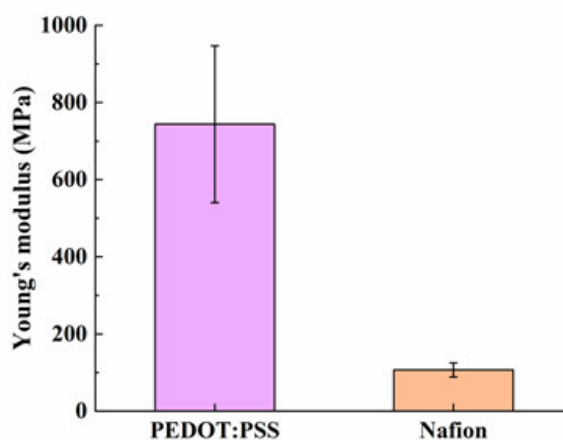

**Figure S2.** The Young's modulus of PEDOT:PSS and Nafion measured by AFM. The data are shown as mean ± SD.
